# Supplementary material for: Occurrence and Ecological Risk Assessment of Heavy Metals from Wuliangsuhai Lake, Yellow River Basin, China
Source: MDPI journal article supplement (doi:10.3390/w14081264), 2022-04-13
Supplement: s1 [file s1]

Archive with 1 entries (1 files):
- water-1667506-supplementary.pdf
