# Supplementary material for: Occurrence and Ecological Risk Assessment of Heavy Metals from Wuliangsuhai Lake, Yellow River Basin, China
Source: MDPI journal article supplement (doi:10.3390/w14081264), 2022-04-13
Supplement: s1 [file s1 › water-1667506-supplementary.pdf]

# Occurrence and Ecological Risk Assessment of Heavy Metals from Wuliangsuhai Lake, Yellow River Basin, China

Jialu Li <sup>1,2</sup>, Qiting Zuo <sup>3,4,5,\*</sup>, Feng Feng <sup>1,2</sup> and Hongtao Jia <sup>1,2</sup>

<sup>1</sup> Yellow River Conservancy Technical Institute, Kaifeng 475000, China; jialuli1227@163.com (J.L.); fengfeng@yrcti.edu.cn (F.F.); jiaht2022@163.com (H.J.)

<sup>2</sup> Henan Engineering Technology Center for Water Resources Conservation and Utilization in the Middle and Lower Reaches of Yellow River, Kaifeng 475004, China

<sup>3</sup> School of Water Conservancy Engineering, Zhengzhou University, Zhengzhou 450001, China

<sup>4</sup> Zhengzhou Key Laboratory of Water Resource and Water Environment, Zhengzhou 450001, China

<sup>5</sup> Henan International Joint Laboratory of Water Cycle Simulation and Environmental Protection, Zhengzhou 450001, China

\* Correspondence: zuoqt@zzu.edu.cn; Tel.: +86-136-5381-7257

## Text S1 Steps of BCR

The optimized BCR three-stage extraction procedure is used to determine the distribution of heavy metal in different chemical fractions and the steps of sequential extraction are listed as following:

Step 1 (Exchangeable fraction): A total of 40mL of 0.11M acetic acid is added to 1g freezing-dried sediment and shake overnight. The mixture is centrifuged to separate the extract from residue.

Step 2 (Reducible fraction): A total of 40mL of 0.5M hydroxylammonium chloride, adjusted with nitric acid to the pH of 1.5, is added to the residue from Step 1 and then extraction performed as above.

Step 3 (Oxidizable fraction): The residue from Step 2 is treated twice with 8.8M hydrogen peroxide, evaporated to near dryness, then 50mL of 1.0 M ammonium acetate, adjusted to pH 2 with nitric acid, is added and the extraction performed as above.

Step 4 (Residual fraction): The material remaining at the end of the BCR procedure is digested in 20mL aqua regia, with microwave assistance, as described above.

## Table S1 Results of the recovery test of standard samples (GSD7)

Table S1. Results of the recovery test of standard samples (GSD7).

| Element | Measured value<br>(mg/kg) | Standard value<br>(mg/kg) | Recovery<br>(%) |
|---------|---------------------------|---------------------------|-----------------|
| Cr      | 110.75                    | 122±7                     | 90.78           |
| Ni      | 48.79                     | 53±4                      | 92.06           |
| Cu      | 33.62                     | 38±2                      | 88.47           |
| Zn      | 258.51                    | 238±12                    | 108.62          |
| As      | 83.21                     | 84±6                      | 99.06           |
| Cd      | 1.00                      | 1.05±0.06                 | 95.24           |
| Hg      | 0.049                     | 0.053±0.013               | 92.45           |

|    |        |        |       |
|----|--------|--------|-------|
| Pb | 345.48 | 350±17 | 98.71 |
|----|--------|--------|-------|

**Table S2 Classification of EF**

**Table S2.** Classification of EF.

| EF value | Grades of EF risk      |
|----------|------------------------|
| EF<2     | minimal enrichment     |
| 2≤EF<5   | moderate enrichment    |
| 5≤EF<20  | significant enrichment |
| 20≤EF<40 | very high enrichment   |
| EF≥40    | extreme enrichment     |

**Table S3 Classification of  $I_{geo}$**

**Table S3.** Classification of  $I_{geo}$ .

| $I_{geo}$ value      | Grades of $I_{geo}$ risk          |
|----------------------|-----------------------------------|
| $I_{geo} \leq 0$     | practically unpolluted            |
| $0 < I_{geo} \leq 1$ | unpolluted to moderately polluted |
| $1 < I_{geo} \leq 2$ | moderately polluted               |
| $2 < I_{geo} \leq 3$ | moderately to strongly polluted   |
| $3 < I_{geo} \leq 4$ | strongly polluted                 |
| $4 < I_{geo} \leq 5$ | strongly to extremely polluted    |
| $I_{geo} > 5$        | extremely polluted                |

**Table S4 Indices and grades of potential ecological risk**

**Table S4.** Indices and grades of potential ecological risk.

| $E_r^i$ value          | Grades of ecological risk of single metal | RI value                   | Grades of potential ecological risk of the environment |
|------------------------|-------------------------------------------|----------------------------|--------------------------------------------------------|
| $E_r^i < 40$           | Low risk                                  | RI<150                     | Low risk                                               |
| $40 \leq E_r^i < 80$   | Moderate risk                             | $150 \leq \text{RI} < 300$ | Moderate risk                                          |
| $80 \leq E_r^i < 160$  | Considerable risk                         | $300 \leq \text{RI} < 600$ | Considerable risk                                      |
| $160 \leq E_r^i < 320$ | High risk                                 | RI≥600                     | Very high risk                                         |
| $E_r^i \geq 320$       | Very high risk                            |                            |                                                        |

**Table S5 Classification of RAC and values of  $\partial$**

**Table S5.** Classification of RAC and values of  $\partial$ .

| Risk           | Metal in exchangeable fraction/% | $\partial$ |
|----------------|----------------------------------|------------|
| No risk        | <1                               | 1.00       |
| Low risk       | 1-10                             | 1.00       |
| Medium risk    | 11-30                            | 1.20       |
| High risk      | 31-50                            | 1.40       |
| Very high risk | >50                              | 1.60       |
